# Supplementary material for: Vitamin D ameliorates systolic but not diastolic blood pressure in patients with type 2 diabetes: Results from a meta-analysis of randomized controlled trials
Source: Atypon-hosted journal article supplement (doi:10.1024/0300-9831/a000291), 2018-02-01
Supplement: 0300-9831_a000291_esm1.pdf [file 0300-9831_a000291_esm1.pdf]

**ESM 1. Table.** Summary of findings Table: clinical outcomes.

| Outcome                         | No of Participants (studies) Follow up | Quality of the evidence (GRADE)                 | Anticipated absolute effects                                                     |                                                                                                          |
|---------------------------------|----------------------------------------|-------------------------------------------------|----------------------------------------------------------------------------------|----------------------------------------------------------------------------------------------------------|
|                                 |                                        |                                                 | Risk with Placebo                                                                | Risk difference with Vitamin D (95% CI)                                                                  |
| <b>Systolic blood pressure</b>  | 1789 (26 studies) 2-12 months          | ⊕⊕⊕⊖<br><b>MODERATE</b><br>due to inconsistency | The mean systolic blood pressure in the control groups was<br><b>130.58 mmHg</b> | The mean systolic blood pressure in the intervention groups was<br><b>2.39 lower</b><br>(-3.76 to -1.02) |
| <b>Diastolic blood pressure</b> | 1663 (24 studies) 2-12 months          | ⊕⊕⊕⊖<br><b>MODERATE</b><br>due to inconsistency | The mean diastolic blood pressure in the control groups was<br><b>77.19 mmHg</b> | The mean diastolic blood pressure in the intervention groups was<br><b>0.89 lower</b><br>(-2.28 to 0.51) |

\* The **corresponding risk** (and its 95% confidence interval) is based on the assumed risk in the comparison group and the **relative effect** of the intervention (and its 95% CI).

**High quality:** Further research is very unlikely to change our confidence in the estimate of effect.

**Moderate quality:** Further research is likely to have an important impact on our confidence in the estimate of effect and may change the estimate.

**Low quality:** Further research is very likely to have an important impact on our confidence in the estimate of effect and is likely to change the estimate.

**Very low quality:** We are very uncertain about the estimate.
