# Supplementary material for: Vitamin D ameliorates systolic but not diastolic blood pressure in patients with type 2 diabetes: Results from a meta-analysis of randomized controlled trials
Source: Atypon-hosted journal article supplement (doi:10.1024/0300-9831/a000291), 2018-02-01
Supplement: 0300-9831_a000291_esm2.pdf [file 0300-9831_a000291_esm2.pdf]

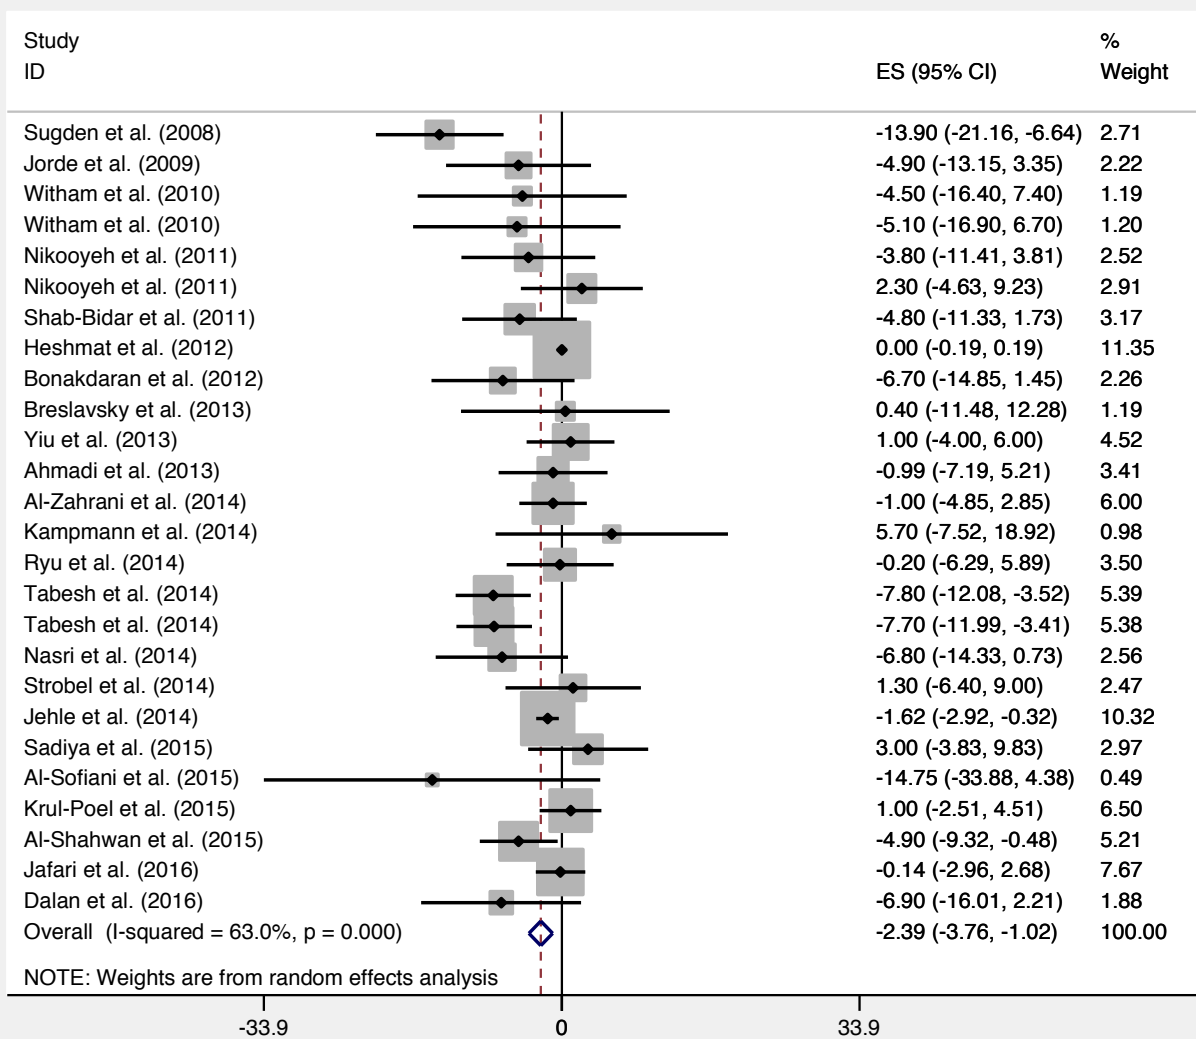

ESM 2. Figure . Forest plot of the effect of vitamin D on systolic blood pressure.

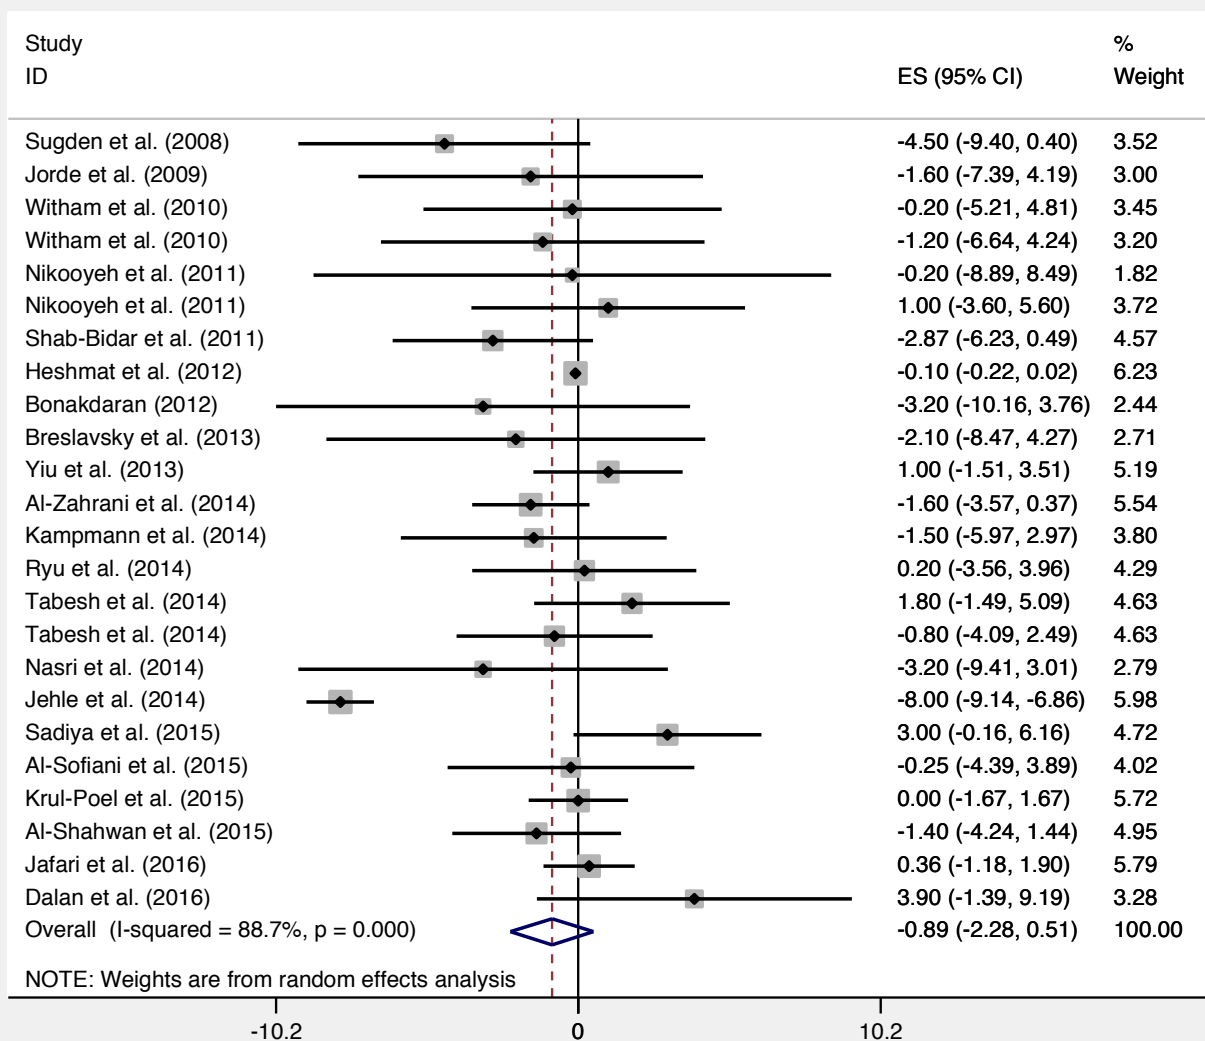

Fig. S2. Forest plot of the effect of vitamin D on diastolic blood pressure.
